# Supplementary material
Source: PubMed Central journal article supplement (PMC8617500)
Supplement: pnas.2112032118.sapp.pdf [file pnas.2112032118.sapp.pdf]

## Supplementary Information for

*De novo* germline mutation in the dual specificity phosphatase 10 gene accelerates autoimmune diabetes

Anne-Perrine Foray, Sophie Candon, Sara Hildebrand, Cindy Marquet, Fabrice Valette, Coralie Pecquet, Sebastien Lemoine, Francina Langa-Vives, Michael Dumas, Peipei Hu, Père Santamaria, Sylvaine You, Stephen Lyon, Lindsay Scott, Chun Hui Bu, Tao Wang, Darui Xu, Eva Marie Y. Moresco, Claudio Scazzocchio, Jean-François Bach\*, Bruce Beutler\*, Lucienne Chatenoud\*

Correspondence to: Jean-François Bach, [jean-francois.bach@academie-sciences.fr](mailto:jean-francois.bach@academie-sciences.fr);  
Bruce Beutler, [Bruce.Beutler@UTSouthwestern.edu](mailto:Bruce.Beutler@UTSouthwestern.edu);  
Lucienne Chatenoud, [lucienne.chatenoud@inserm.fr](mailto:lucienne.chatenoud@inserm.fr).

### **This PDF file includes:**

Figures S1 to S9  
Table S1  
Legend for Dataset S1  
SI References 1-9

### **Other Supplementary Information for this manuscript include the following:**

Dataset S1

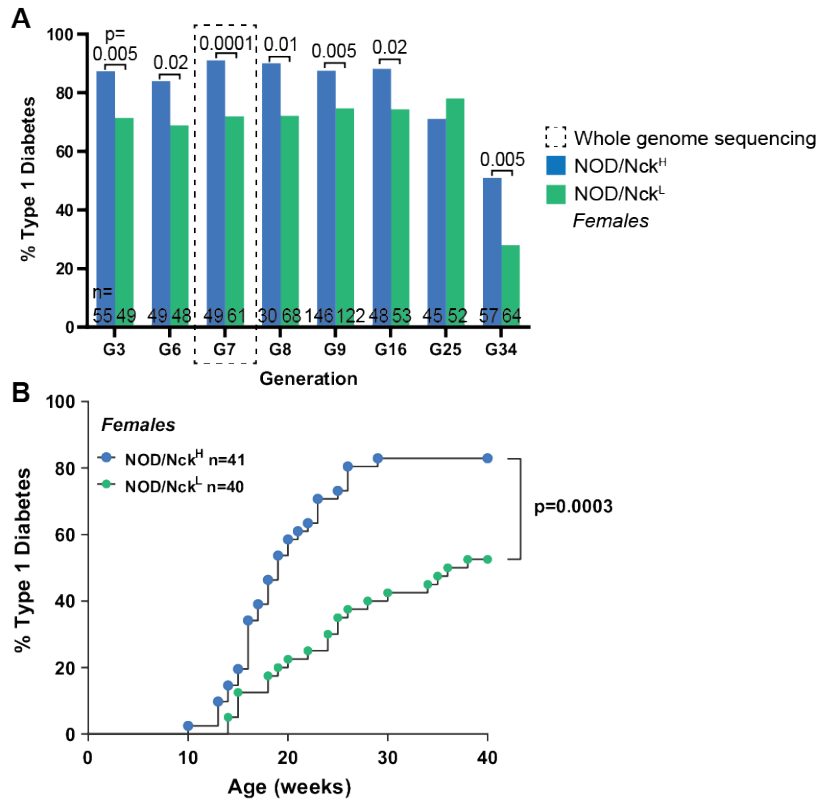

**Fig. S1.**

Diabetes incidence in female sublines of the NOD/Nck strain. (A) Incidence of T1D in NOD/Nck<sup>H</sup> and NOD/Nck<sup>L</sup> female mice from generation 3 up to generation 34. (B) Incidence of T1D in NOD/Nck<sup>H</sup> and NOD/Nck<sup>L</sup> female mice derived from embryos frozen at generation 7 and revitalized.

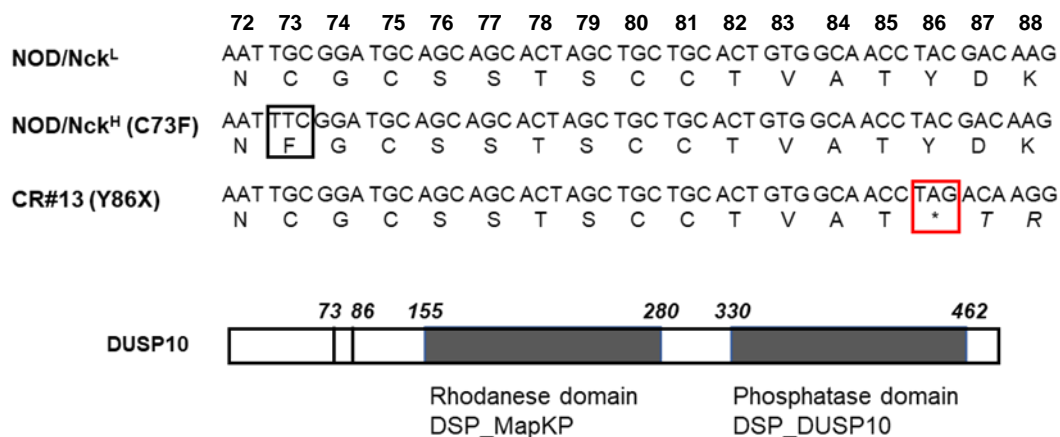

**Fig. S2.**

*Dusp10* nucleotide sequence and deduced amino acid sequence. This diagram shows the part of the first *Dusp10* domain containing the nonsynonymous G to T transversion resulting in the cysteine-to-phenylalanine missense mutation at position 73 in the protein DUSP10 (black square) in NOD/Nck<sup>H</sup> mice. The mutation in CR#13 mice is also shown, here the deletion of a single nucleotide generates a premature STOP codon at position 86 of the protein (red square). Amino acid numbers are shown above. The variant we describe here is localized in the possibly intrinsically disordered first N-terminal domain (from residue 1 to 143, as predicted by Spot-Disorder, alternation of ordered and disordered regions from residue 1 to predicted 140 by PrDos and from residue 1 to 155 by Biomine).



**Fig. S3.**

Alignment of putative orthologues of the murine (*Mm*) and human (*Hs*) Dusp10 protein in representative vertebrates. *Crp*: *Crocodylus porosus*, reptile, crocodile; *Chp*: *Chrysemys picta bellii* reptile, turtle (sub- class chelonia); *Gg*: *Gallus gallus* Aves; *Xt*: *Xenopus tropicalis*, amphibia; *Rt*: *Rhincodon typus* Chondrichthyes (cartilaginous fishes) Whale shark; *Dr*: *Danio rerio*, Actinopterygii (sub- class bony fishes); *Pm*: *Petromyzon marinus* Hyperoartia, Sea Lamprey. The red symbol indicates the Cys to Phe mutation of the mouse Dusp10 protein discussed in the text. Alignment carried out with MAFFT G-INS-i with default parameters and visualised with BoxShade. Double headed arrows: Orange: intrinsically disordered sequence, Blue: central "Rhodanese-like" domain, Green: catalytic domain.

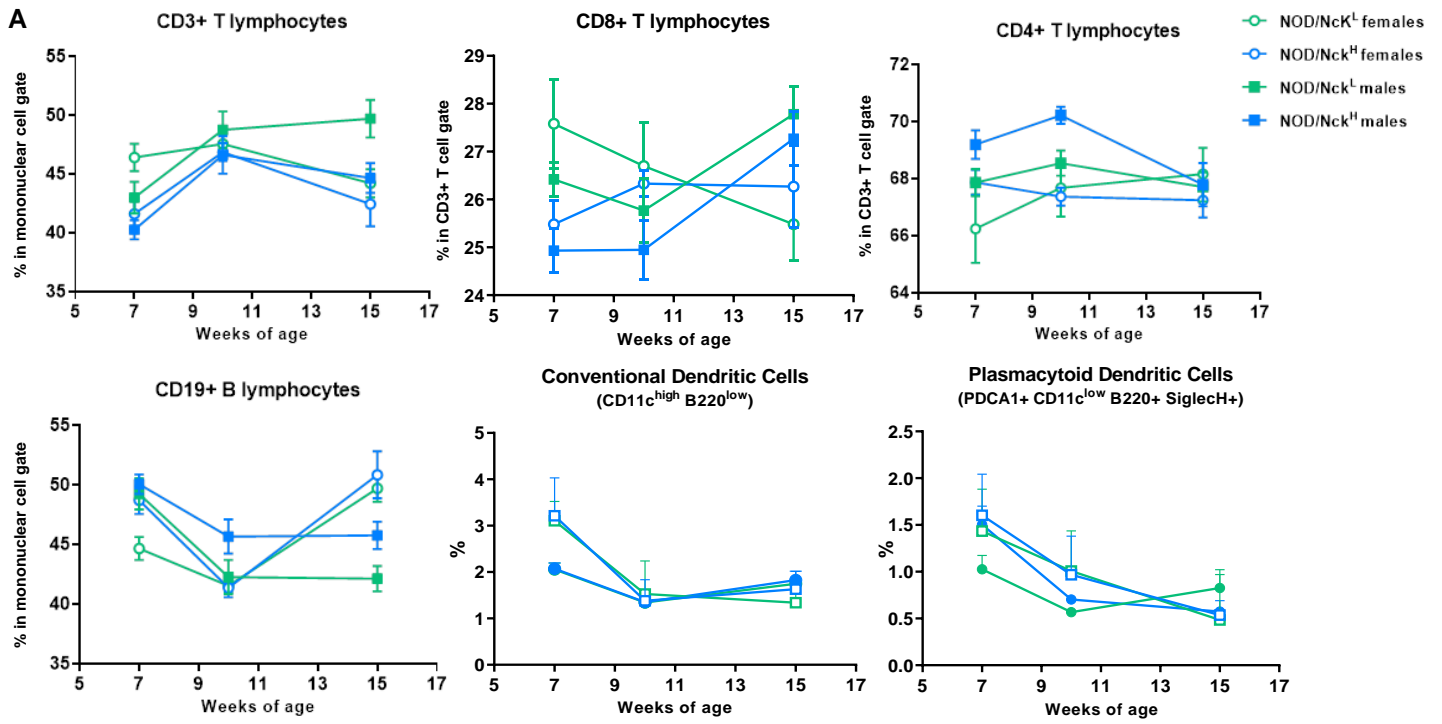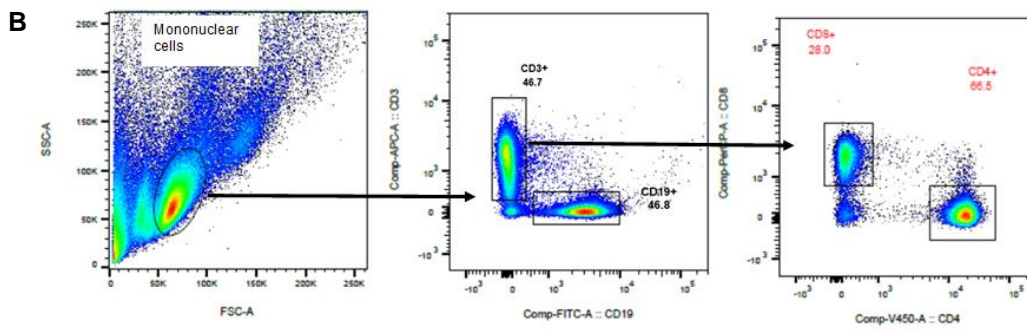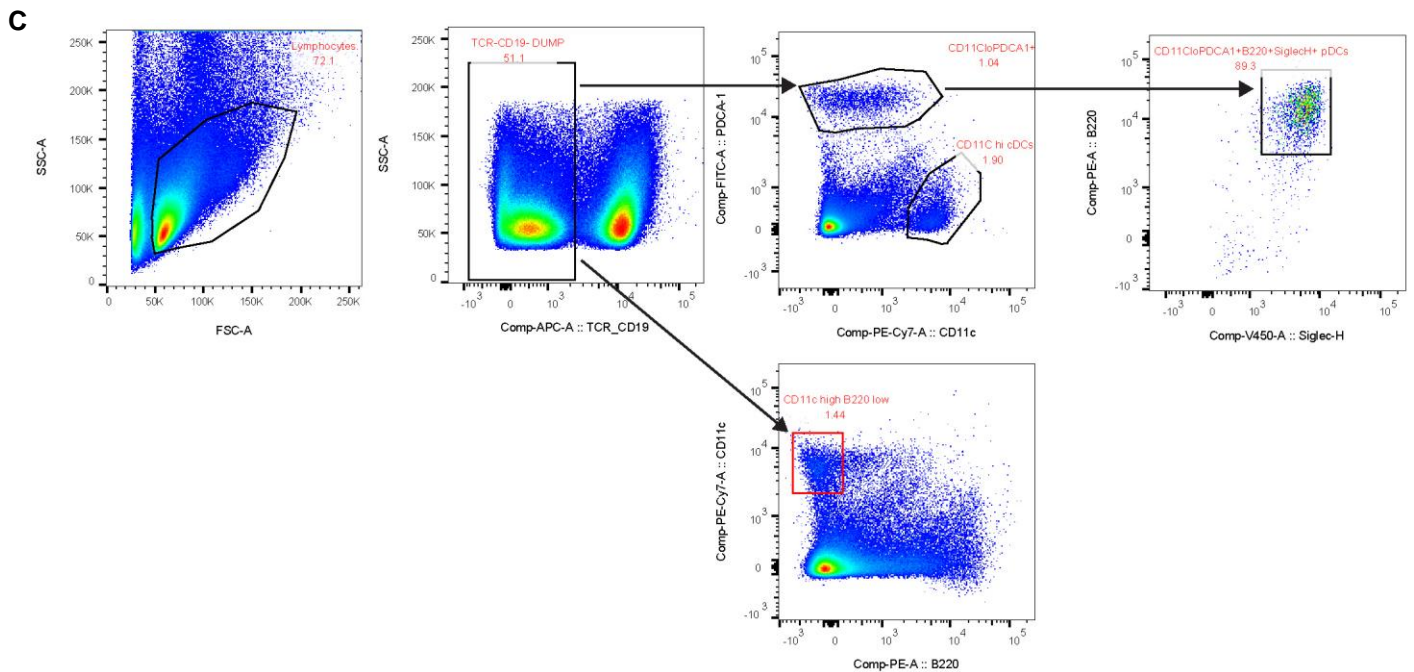

**Fig. S4.**

Immune cell subsets in the spleen of NOD/Nck<sup>H</sup> and NOD/Nck<sup>L</sup> at different ages. **(A)** Immune cell subsets were monitored in the spleen of NOD/Nck<sup>H</sup> and NOD/Nck<sup>L</sup> mice at different ages using flow cytometry. Data are presented as means  $\pm$  SEM of 6 individuals analyzed at each point in time. No significant differences were observed when comparing at the same age values observed between the two different sublines and also considering the different genders. **(B-C)** Flow cytometry gating strategies for T cells and B cells **(B)** or conventional dendritic cells and plasmacytoid dendritic cells **(C)**.

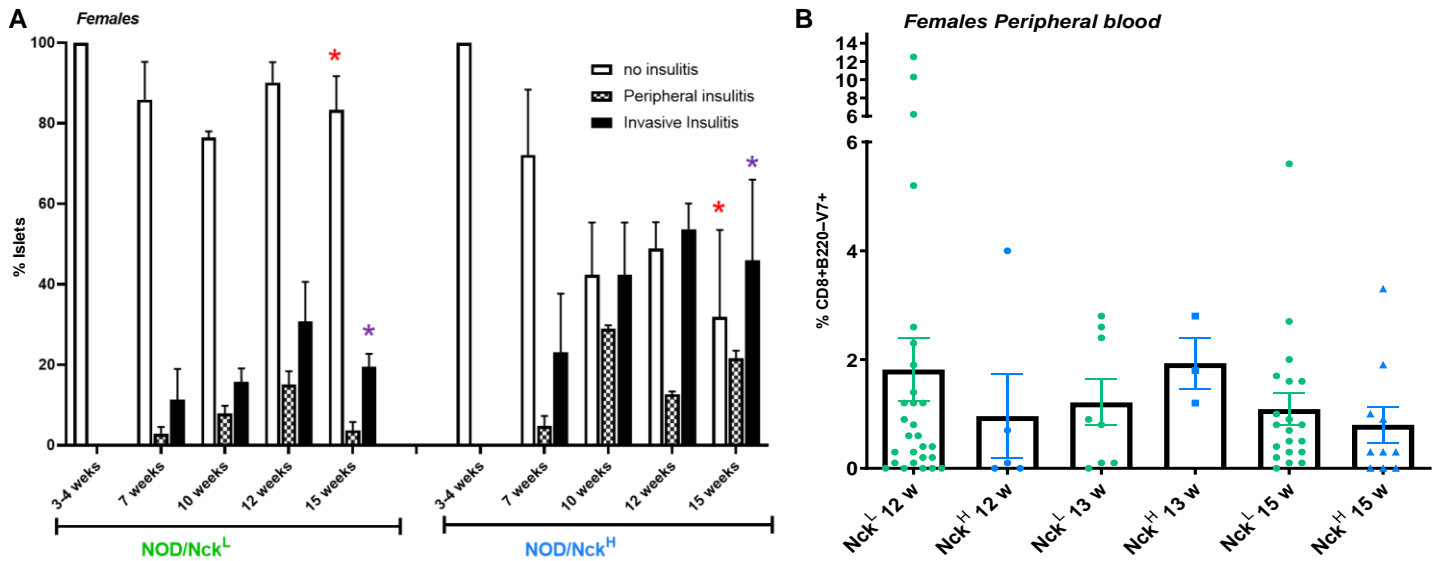

**Fig. S5.**

Islet infiltration and pathogenic T lymphocytes in female NOD/Nck<sup>H</sup> and NOD/Nck<sup>L</sup>. **(A)** Insulinitis was monitored in NOD/Nck<sup>H</sup> and NOD/Nck<sup>L</sup> female mice as described in legend of figure 2; 60 to 100 islets were counted per pancreas from 3-6 individuals. Results are expressed as mean  $\pm$  SEM. At 15wks of age in NOD/Nck<sup>H</sup> mice a significant decrease (red asterisk) in the proportion of normal non-infiltrated islets and a significant increase (black asterisk) of islets with invasive insulinitis was observed as compared to NOD/Nck<sup>L</sup> (Mann Whitney test,  $p < 0.0094$  and  $p < 0.0029$  respectively). **(B)** Pathogenic CD8<sup>+</sup> T cells specific for the beta-cell-specific IGRP<sub>206-214</sub> epitope were enumerated in peripheral blood of NOD/Nck<sup>H</sup> and NOD/Nck<sup>L</sup> male mice using the NRP-V7 mimotope as previously described (1). Data are expressed in individual mice as % NRP-V7<sup>+</sup> cells within the CD8<sup>+</sup>B220<sup>-</sup> gate and also presented as mean  $\pm$  SEM of the analyzed individuals.



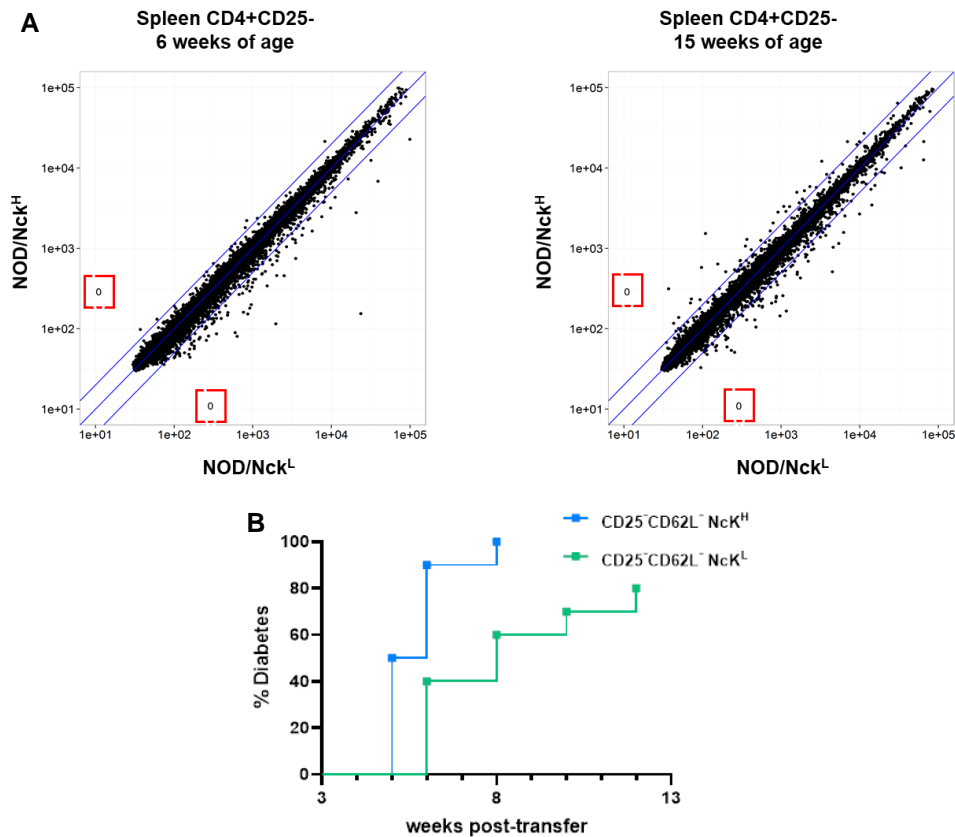

**Fig. S6.**

**Analysis of pathogenic CD4+ T cells in NOD/Nck sublines.** (A) Transcriptome-wide expression scatter plot of average gene expression in NOD/Nck<sup>H</sup> and NOD/Nck<sup>L</sup> mice of male spleen CD4+CD25- T cells recovered at 6 and 15 weeks of age. This population is depleted of regulatory T cells (CD4+CD25+FoxP3+) (2-6) and is enriched in CD4+ pathogenic lymphocytes (CD4+CD62L-) (7). Confronting these samples, no genes were significantly up or down regulated (Fold change > 1.5 and FDR<0.05), as indicated by the numbers in the red boxes. (B) Splenocytes were recovered from 10 wk-old NOD/Nck<sup>H</sup> and NOD/Nck<sup>L</sup> male donors. Cells were purified by magnetic cell sorting (MACS) to recover CD25-CD62L- T cells (CD4+ and CD8+), a population depleted of regulatory T cells and enriched in pathogenic cells (2-7). As previously shown this population is highly effective at transferring autoimmune diabetes in immunoincompetent recipients (as effective as total spleen cells from overtly diabetic donors (4)). NOD/Nck *Rag*<sup>-/-</sup> recipients were adoptively transferred with 0.4x10<sup>6</sup> purified CD25-CD62L- T cells from NOD/Nck<sup>H</sup> or NOD/Nck<sup>L</sup> mice. Incidence of diabetes was monitored in recipients (n=10/group). Transfer of disease was very effective with the two cell populations tested. Actuarial survival curves were compared using the Logrank (Mantel-Cox) statistical test. The difference observed is significant (p=0.0025) and well reflects the time-shifted difference in the advent of autoimmune diabetes observed in NOD/Nck<sup>H</sup> as compared to NOD/Nck<sup>L</sup> mice.

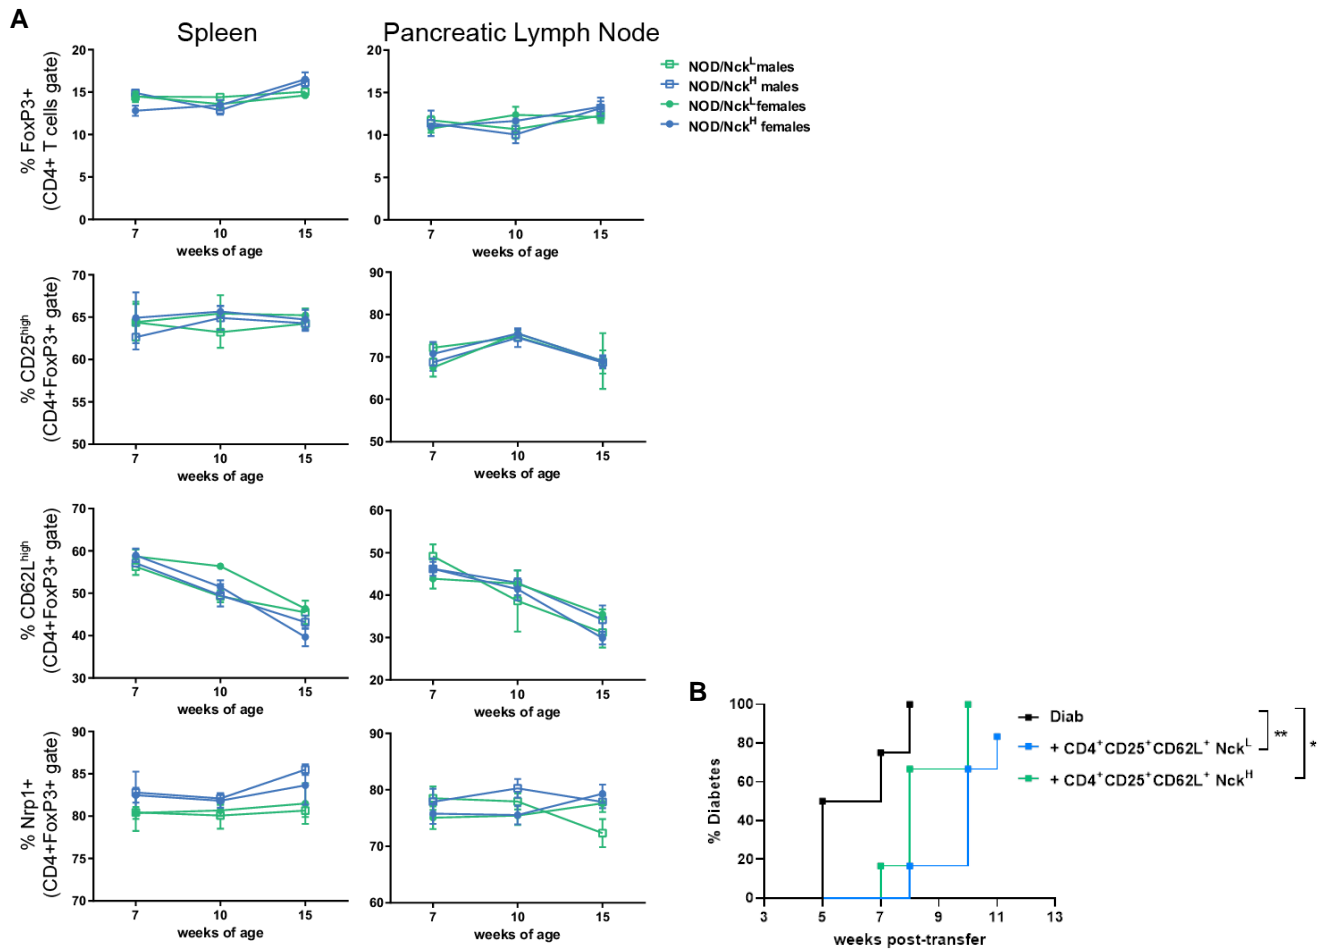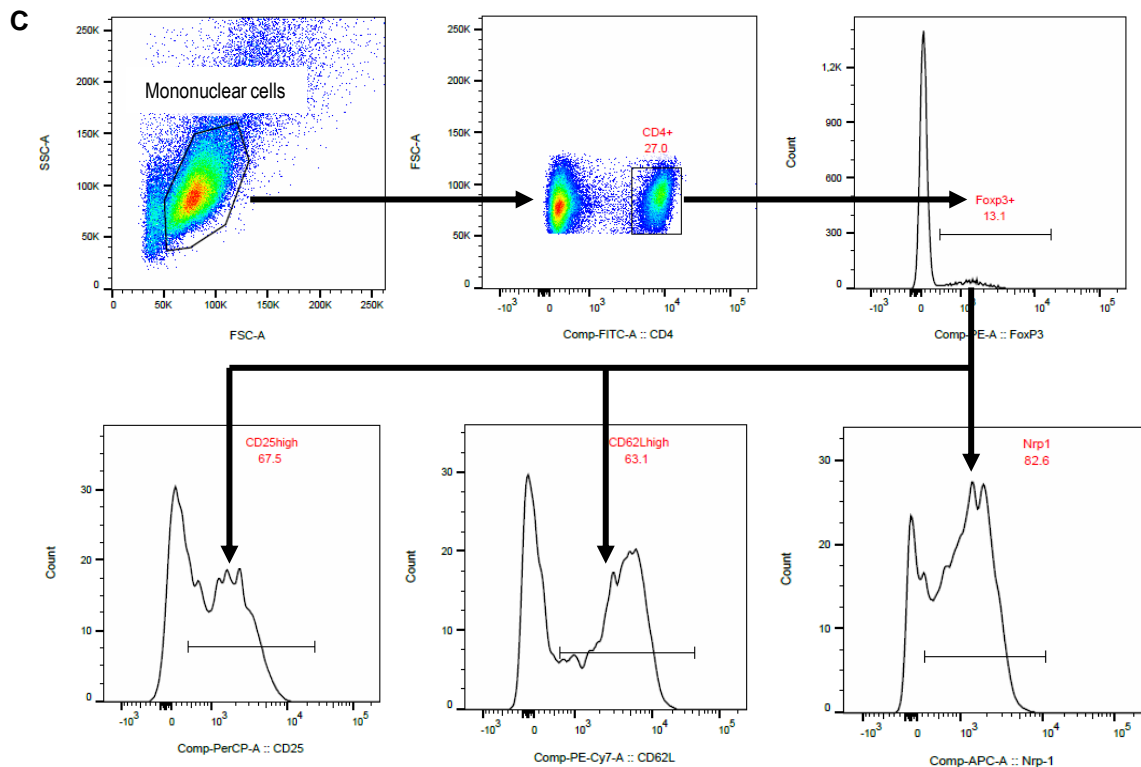

**Fig. S7.**

**Analysis of regulatory CD4+ T cells in NOD/Nck sublines.** (A) Phenotypic analysis by flow cytometry of regulatory T cells in the spleen and pancreatic lymph nodes of male and female NOD/Nck<sup>H</sup> and NOD/Nck<sup>L</sup> mice at 7, 10 and 15 weeks of age. The figure details the proportions in each lymphoid organ of FoxP3+ cells in the CD4+ T cells gate and of CD4+CD25<sup>high</sup>, CD62L<sup>high</sup> and (Neuropilin 1) Nrp+ cells in the CD4+FoxP3+ gate. Data are presented as means ± SEM of 6 individuals analyzed at each point in time. No significant differences were observed when comparing at the same age values observed between the two different sublines and also considering the different genders. (B) Adoptive co-transfer in NOD/Nck *Rag*<sup>-/-</sup> recipients of a mixture of 3 x 10<sup>6</sup> diabetogenic cells (total spleen cells from overtly diabetic mice) and 3 x 10<sup>6</sup> of magnetic sorted CD4+CD25<sup>high</sup>CD62L<sup>high</sup> cells, a population highly enriched in regulatory T cells (2-6), from 14-week-old NOD/Nck<sup>H</sup> or NOD/Nck<sup>L</sup>. Controls were injected with diabetogenic T cells alone. Actuarial survival curves were compared using the Logrank (Mantel-Cox) statistical test. Disease transfer by diabetogenic cells was significantly delayed by regulatory T cells from both NOD/Nck<sup>H</sup> (p=0.039) and NOD/Nck<sup>L</sup> (p=0.0032). (C) Flow cytometry gating strategies for subsets of CD4+FoxP3+ regulatory T cells.

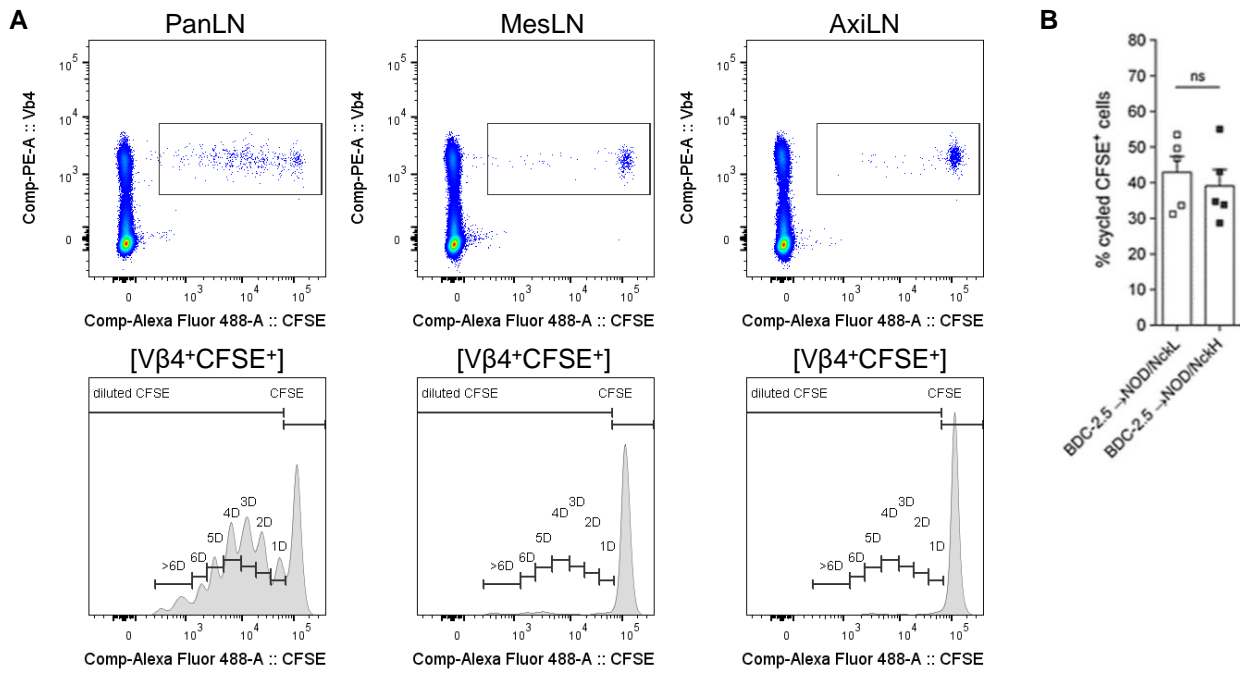

**Fig. S8.**

**Timing of islet antigen presentation in NOD/Nck sublines.** Similar timing of islet antigen presentation was observed in NOD/Nck<sup>H</sup> and NOD/Nck<sup>L</sup> mice as assessed by a well-established method (8). (A) NOD/Nck<sup>H</sup> and NOD/Nck<sup>L</sup> mice were injected i.v at 4 weeks of age with  $1 \times 10^6$  CFSE-labelled transgenic BDC-2.5 CD4<sup>+</sup> T cells (V $\beta$ 4<sup>+</sup>) expressing a T cell receptor specific for an insulin-chromogranin A fusion peptide (9). Proliferation of transferred cells in was analyzed by flow cytometry 96 hours after injection in pancreatic draining lymph nodes (PanLN) as compared to mesenteric lymph nodes (MesLN) and axillary lymph nodes (AxiLN) of recipient mice. As already described BDC-2.5 CD4<sup>+</sup> T cells proliferated exclusively in pancreatic lymph nodes where the cognate islet antigens is presented (8). (B) An identical capacity of diabetogenic cells expressing the transgenic BDC2.5 T cell receptor to migrate and proliferate in pancreatic lymph-nodes when adoptively transferred into 4-week-old recipients. Results are expressed as the percentage of CFSE proliferating cells in mice of the two sublines of  $10^6$  CFSE-labelled naïve BDC-2.5 CD4<sup>+</sup> T cells. Mann-Whitney test; ns, non-significantly different.

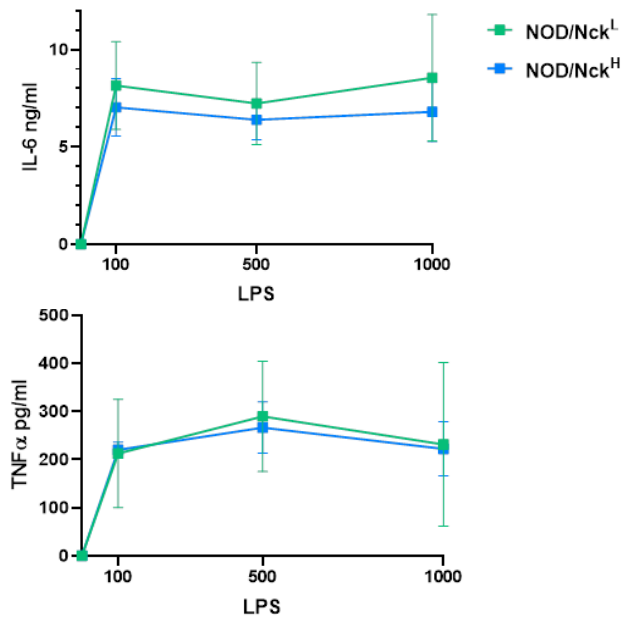

**Fig. S9.**

**Innate immune response in NOD/Nck<sup>H</sup> and NOD/Nck<sup>L</sup> mice.** IL-6 and TNFα production by peritoneal macrophages of NOD/Nck<sup>H</sup> and NOD/Nck<sup>L</sup> mice (male mice, 8-10 weeks of age) upon lipopolysaccharide (LPS) stimulation. No significant differences were observed.

**Table S1.**

Coding SNPs and Small Indels specific for the NOD/NckL and NOD/NckH sublines.

| Chr   | Position  | Reference | Variant | Type           | Class    | Subline              | Gene Name              | Amino acid change | Idd region     |
|-------|-----------|-----------|---------|----------------|----------|----------------------|------------------------|-------------------|----------------|
| chr1  | 20914658  | G         | T       | Intragenic     |          | NOD/Nck <sup>L</sup> | <i>Paqr8</i>           | -                 | <i>Idd26</i>   |
| chr1  | 153744230 | G         | A       | 3' UTR         |          | NOD/Nck <sup>H</sup> | <i>Rgs16</i>           | -                 | <i>Idd5.4b</i> |
| chr1  | 184037056 | G         | T       | Non-synonymous | Missense | NOD/Nck <sup>H</sup> | <i>Dusp10</i>          | C73F              | -              |
| chr1  | 36533553  |           |         | 3' UTR         |          | NOD/Nck <sup>L</sup> | <i>Gm5615</i> *        | -                 | <i>Idd2</i>    |
| chr4  | 149952486 | C         | T       | Intragenic     |          | NOD/Nck <sup>L</sup> | <i>Spsb1</i>           | -                 | <i>Idd9.3</i>  |
| chr5  | 31487373  | GAGAAG    | GAG     | Codon deletion |          | NOD/Nck <sup>L</sup> | <i>4930548H24Rik</i>   | -                 | -              |
| chr7  | 30878082  | C         | T       | Non-synonymous | Missense | NOD/Nck <sup>L</sup> | <i>Cd22</i>            | R2H               | -              |
| chr7  | 87243067  | A         | G       | Intragenic     |          | NOD/Nck <sup>L</sup> | <i>Nox4</i>            | -                 | <i>Idd27</i>   |
| chr8  | 119633519 | G         | T       | Stop gained    | Nonsense | NOD/Nck <sup>H</sup> | <i>Kcng4</i>           | Y39*              | -              |
| chr8  | 122495569 | G         | A       | Non-synonymous | Missense | NOD/Nck <sup>H</sup> | <i>Fam38a (Piezol)</i> | R941W             | -              |
| chr9  | 20438546  | C         | A       | Non-synonymous | Missense | NOD/Nck <sup>H</sup> | <i>Zfp26</i>           | A241S             | -              |
| chr13 | 64287285  | G         | A       | Intragenic     |          | NOD/Nck <sup>L</sup> | <i>Aaed1</i>           | -                 | <i>Idd14</i>   |
| chr14 | 20469411  | C         | T       | Non-synonymous | Missense | NOD/Nck <sup>H</sup> | <i>Anxa7</i>           | G113E             | -              |
| chr15 | 35846957  | G         | T       | Non-synonymous | Missense | NOD/Nck <sup>H</sup> | <i>Vps13b</i>          | A2629S            | -              |
| chr17 | 35380405  | G         | A       | Non-synonymous | Missense | NOD/Nck <sup>L</sup> | <i>H2-Q4</i>           | <i>D155N</i>      | <i>Idd24</i>   |
| chrX  | 7560336   | C         | A       | Non-synonymous | Missense | NOD/Nck <sup>H</sup> | <i>Ppp1r3f</i> *       | G562V             | -              |

**Dataset S1. (separate file)**

Validated DNA sequence variants distinguishing NOD/Nck<sup>H</sup> and NOD/Nck<sup>L</sup> sublines used for Automated Meiotic Mapping.

## References

1. Trudeau JD, et al., Prediction of spontaneous autoimmune diabetes in NOD mice by quantification of autoreactive T cells in peripheral blood. *The Journal of clinical investigation* **111**:217-223 (2003).
2. Alyanakian MA, et al., Diversity of regulatory CD4+T cells controlling distinct organ-specific autoimmune diseases. *Proceedings of the National Academy of Sciences of the United States of America* **100**:15806-15811 (2003).
3. Salomon B, et al., B7/CD28 costimulation is essential for the homeostasis of the CD4+CD25+ immunoregulatory T cells that control autoimmune diabetes. *Immunity* **12**:431-440 (2000).
4. You S, et al., Autoimmune diabetes onset results from qualitative rather than quantitative age-dependent changes in pathogenic T-cells. *Diabetes* **54**:1415-1422 (2005).
5. You S, et al., Adaptive TGF-beta-dependent regulatory T cells control autoimmune diabetes and are a privileged target of anti-CD3 antibody treatment. *Proceedings of the National Academy of Sciences of the United States of America* **104**:6335-6340 (2007).
6. You S, et al., Unique role of CD4+CD62L+ regulatory T cells in the control of autoimmune diabetes in T cell receptor transgenic mice. *Proceedings of the National Academy of Sciences of the United States of America* **101 Suppl 2**:14580-14585 (2004).
7. Lepault F Gagnerault MC, Characterization of peripheral regulatory CD4+ T cells that prevent diabetes onset in nonobese diabetic mice. *Journal of immunology (Baltimore, Md. : 1950)* **164**:240-247 (2000).
8. Höglund P, et al., Initiation of autoimmune diabetes by developmentally regulated presentation of islet cell antigens in the pancreatic lymph nodes. *The Journal of experimental medicine* **189**:331-339 (1999).
9. Delong T, et al., Pathogenic CD4 T cells in type 1 diabetes recognize epitopes formed by peptide fusion. *Science (New York, N.Y.)* **351**:711-714 (2016).
